# Supplementary material for: The nuclear shuttle protein determines host-range specificity of Tomato leaf curl New Delhi virus strains in tomato and cucurbit plants
Source: Research Square preprint supplement (doi:10.21203/rs.3.rs-8698328/v1), 2026-02-05
Supplement: Supplementary file 1 [file 03de269cf273d46897080d02.docx]

**The nuclear shuttle protein determines host-range specificity of Tomato leaf curl New Delhi virus strains in tomato and cucurbit plants**

Romanos Zois1,2, Luuk D. H. Veenendaal1, Mireille van Damme1, Svenning R. Möller3, M. N. Maruthi3, Yuling Bai1, Anne-Marie A. Wolters1,*

**Supplementary material**

**Table S1**PCR primers used for: **(A)** construction of PVX vectors expressing ToLCNDV DNA-B genes, **(B)** construction of overexpression (OE) vectors carrying ToLCNDV DNA-B genes, **(C)** quantification by qPCR and detection by PCR of ToLCNDV genomes, **(D)** linearization and amplification of circular DNA including the NSP gene, and **(E)** detection of the pK7WG2 overexpression vector 35S promoter.

| **(A)** | CE_pSfinx (vector)_FW | gcggccgcGTCGACCGCC |
| --- | --- | --- |
| CE_pSfinx (vector)_RV | ggcgcgccAATCGATGCT |
| CE_Jes-MP_FW | ctagcatcgattggcgcgccATGTCAATAGGGAATGATG |
| CE_Jes-MP_RV | tcggcggtcgacgcggccgcTTACACATCCTTAGACATTG |
| CE_Jes-NSP_FW | ctagcatcgattggcgcgccATGTGCTTTCATTCAAACA |
| CE_Jes-NSP_RV | tcggcggtcgacgcggccgcTCATCCAATGTAATTAAGTATTAC |
| CE_CB-MP_FW | ctagcatcgattggcgcgccATGTCAATAGGAAATGATGG |
| CE_CB-MP_RV | tcggcggtcgacgcggccgcTTACACGCCCTTTGATAT |
| CE_CB-NSP_FW | ctagcatcgattggcgcgccATGGTTTCGTCGTTGC |
| CE_CB-NSP_RV | tcggcggtcgacgcggccgcTCATCCAATGTAATTAAGAATTAC |
| **(B)** | attB1-MP Jes FW | GGGGACAAGTTTgtacaaaaaagcaggctCAATGTCAATAGGGAATGATG |
| MP Jes-aatB2 RV | GGGGACCACTTTGTACAAGaaagctgggtCTTACACATCCTTAGACATTG |
| attB1-NSP Jes FW | GGGGACAAGTTTgtacaaaaaagcaggctCAATGTGCTTTCATTCAAACA |
| NSP Jes-aatB2 RV | GGGGACCACTTTGTACAAGaaagctgggtCTCATCCAATGTAATTAAGTATTAC |
| attB1-MP CB FW | GGGGACAAGTTTgtacaaaaaagcaggctCAATGTCAATAGGAAATGATGG |
| MP CB-aatB2 RV | GGGGACCACTTTGTACAAGaaagctgggtCTTACACGCCCTTTGATAT |
| attB1-NSP CB FW | GGGGACAAGTTTgtacaaaaaagcaggctCAATGGTTTCGTCGTTGC |
| NSP CB-aatB2 RV | GGGGACCACTTTGTACAAGaaagctgggtCTCATCCAATGTAATTAAGAATTAC |
| **(C)** | qPCR ToLCNDV DNA-A FW | GTGTTGCTTTGCCAGTCACG |
| qPCR ToLCNDV DNA-A RV | GCAAAACAATGTGGGCTCGT |
| qPCR ToLCNDV DNA-B FW | CTTAATTACATTGGATGATGTAT |
| qPCR ToLCNDV DNA-B RV | CAATAGGTCCGAACGAAT |
| EF-F | ATTGGAAACGGATATGCCCCT |
| EF-R | TCCTTACCTGAACGCCTGTCA |
| **(D)** | NSP mid FW | GGAAGACCCGGAAGCCTC |
| NSP mid RV | GGGATGGGTACTGCGATAGC |
| **(E)** | 35S FW | TAGCTGGGCAATGGAATCCG |
| 35S RV | AGAACTCGCCGTGAAGACTG |


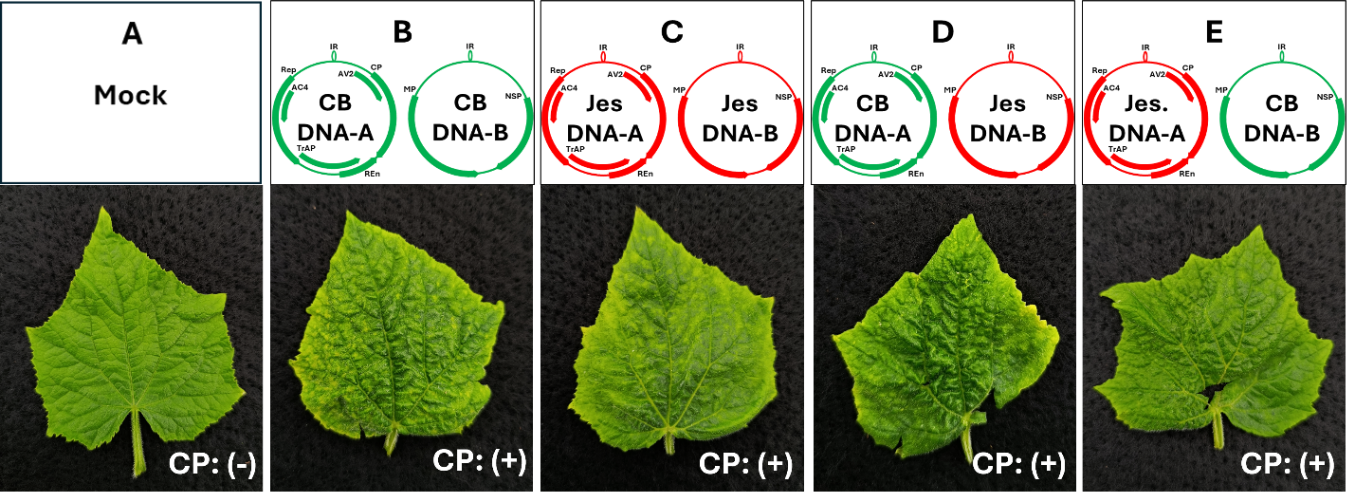


**Fig. S1**Infectivity of reassorted genome components of ToLCNDV strains Jes and CB in cucumber plants. **(A)** Leaf from mock-treated plant, **(B)** Leaf from CB DNA-A+B inoculated plant, **(C)** Leaf from Jes DNA-A+B inoculated plant, **(D)** Leaf from CB DNA-A and Jes DNA-B inoculated plant, **(E)** Leaf from Jes DNA-A and CB DNA-B inoculated plant. CP (+): coat protein detected by ToLCNDV immunostrip test; CP (–): coat protein not detected.


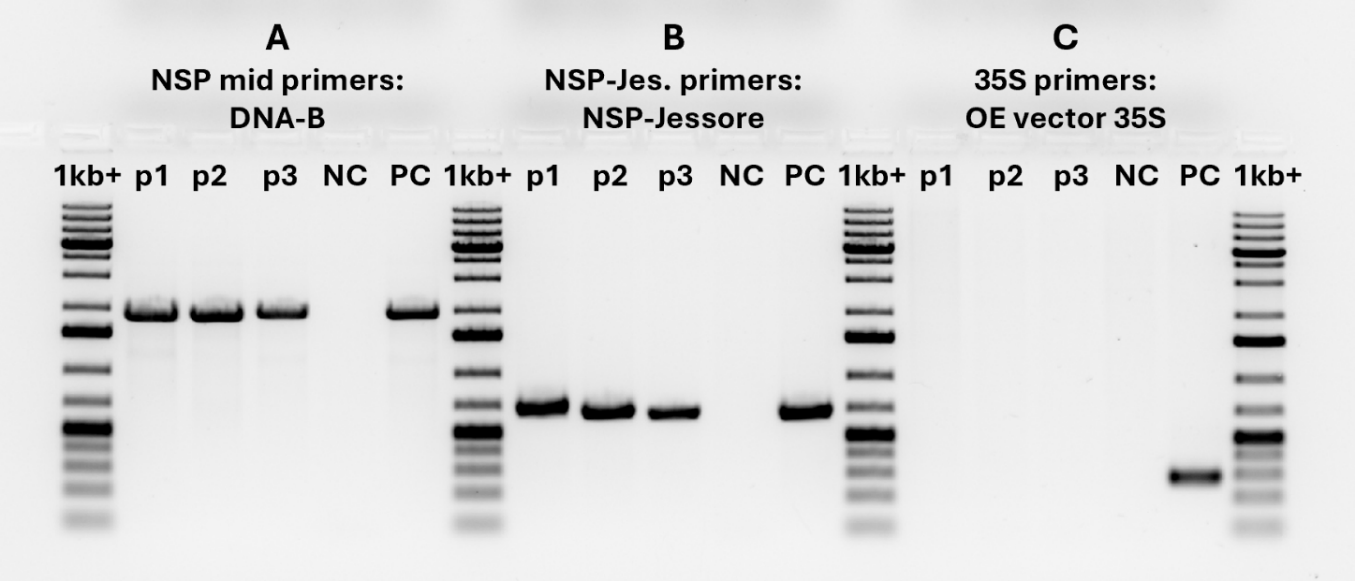


**Fig. S2** Gel electrophoresis of PCR amplification using genomic DNA from systemic leaves of three plants (p1, p2, p3) agroinfiltrated with ToLCNDV-CB DNA-A+B together with the Jes-NSP overexpression (OE) construct, which developed systemic symptoms. **(A)** Outward-facing primers designed in the middle of NSP to linearize circular DNA-B. Negative control (NC): DNA from asymptomatic plants infiltrated with ToLCNDV-CB DNA-A+B plus OE Jes-MP. Positive control (PC): DNA from symptomatic plants infiltrated with ToLCNDV-Jes DNA-A+B. **(B)** Jes-NSP–specific primers amplifying the full gene sequence. NC: plasmid DNA from the ToLCNDV-CB DNA-B agro-clone. PC: DNA from symptomatic plants infiltrated with ToLCNDV-Jes DNA-A+B. **(C)** Primers targeting a 35S promoter fragment of the overexpression vector (pK7WG2). NC: DNA from symptomatic plants infiltrated with ToLCNDV-Jes DNA-A+B. PC: plasmid DNA from *Agrobacterium* carrying the OE Jes-NSP construct. The 1 kb+ ladder was used as a molecular size marker.
