# Supplementary material for: The nuclear shuttle protein determines host-range specificity of Tomato leaf curl New Delhi virus strains in tomato and cucurbit plants
Source: Research Square preprint supplement (doi:10.21203/rs.3.rs-8698328/v1), 2026-02-05

**Supplementary File S1: Original gel pictures of Figure 3H and I, Figure 5G and H, and Figure S2.**

Original agarose gel images used to create manuscript figures. All the gel images are shown as a grayscale-inverted version for improved visualization; no other image processing was performed.

Original, uncropped gel image from which the cropped and rearranged panels shown in **Figure 3H and 3I** were derived.


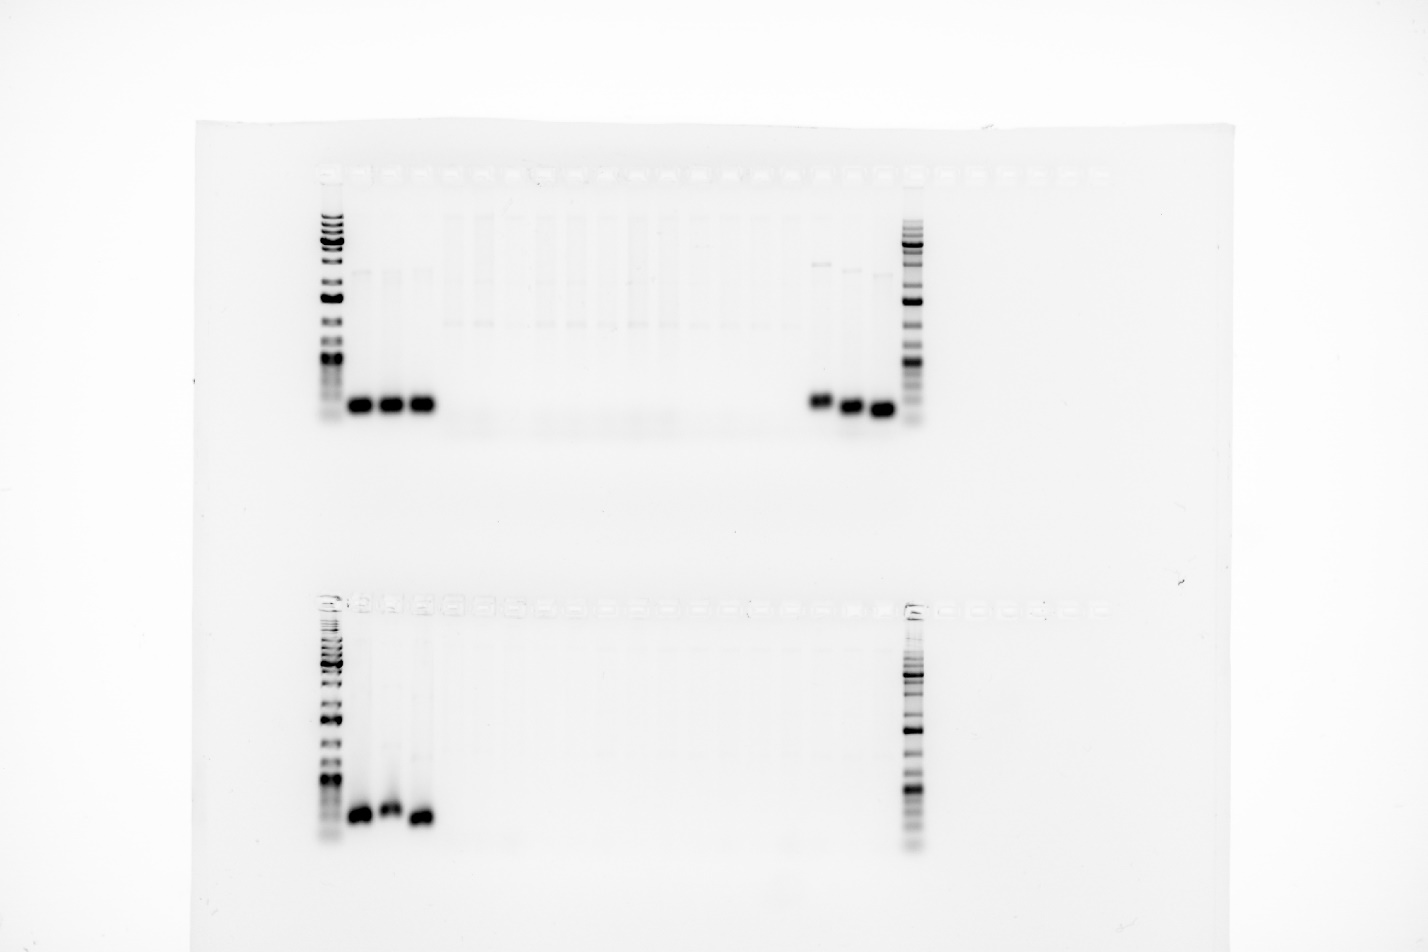


Original, uncropped gel image from which the cropped and rearranged panels shown in **Figure 5G and 5H** were derived.


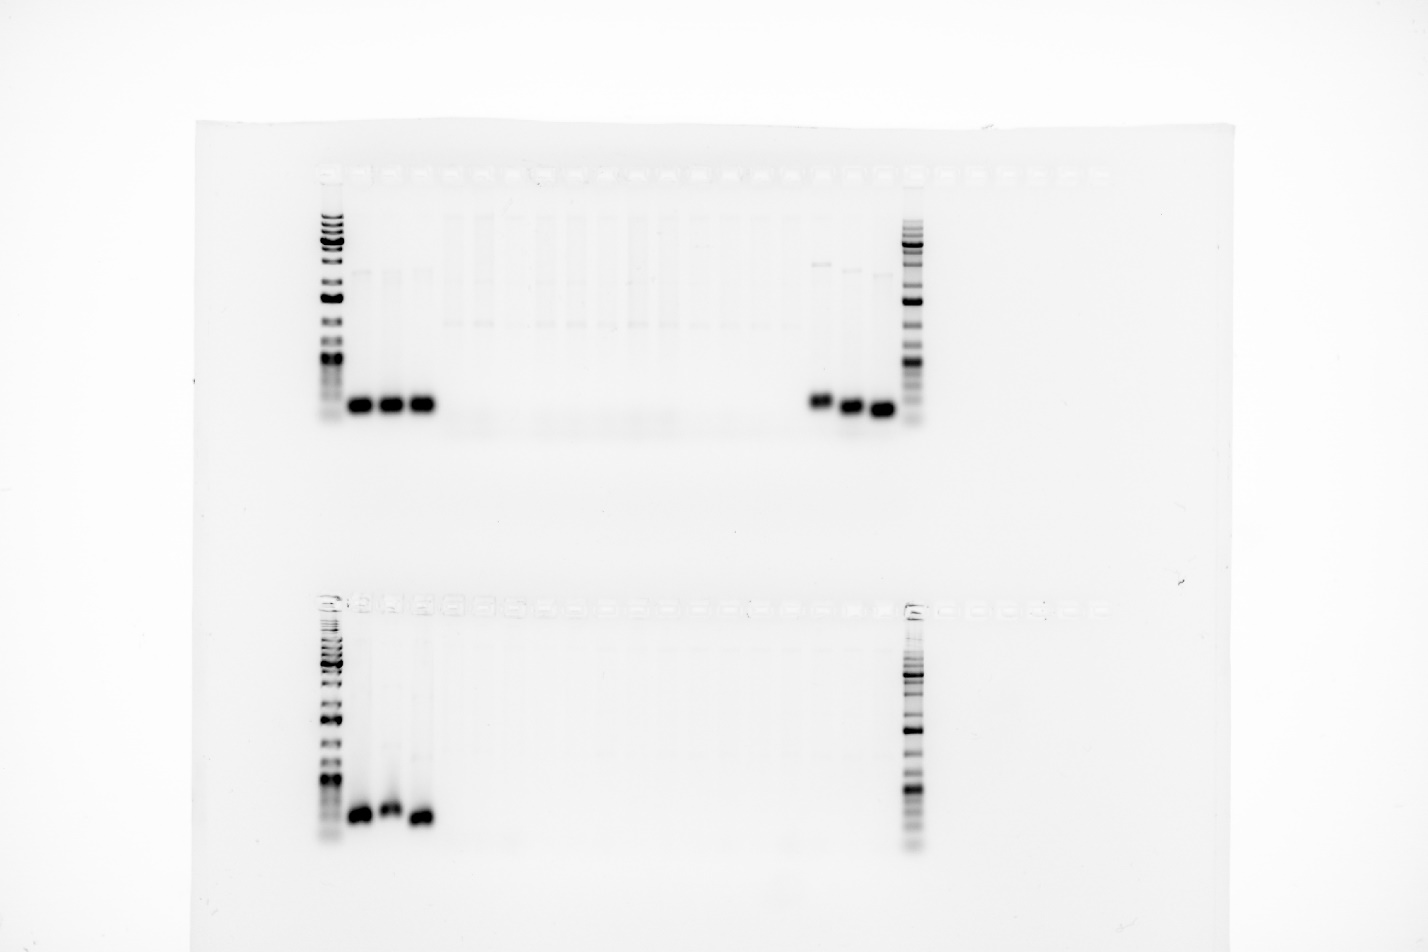


Original, uncropped gel image from which the cropped and rearranged panels shown in **Figure S2**.


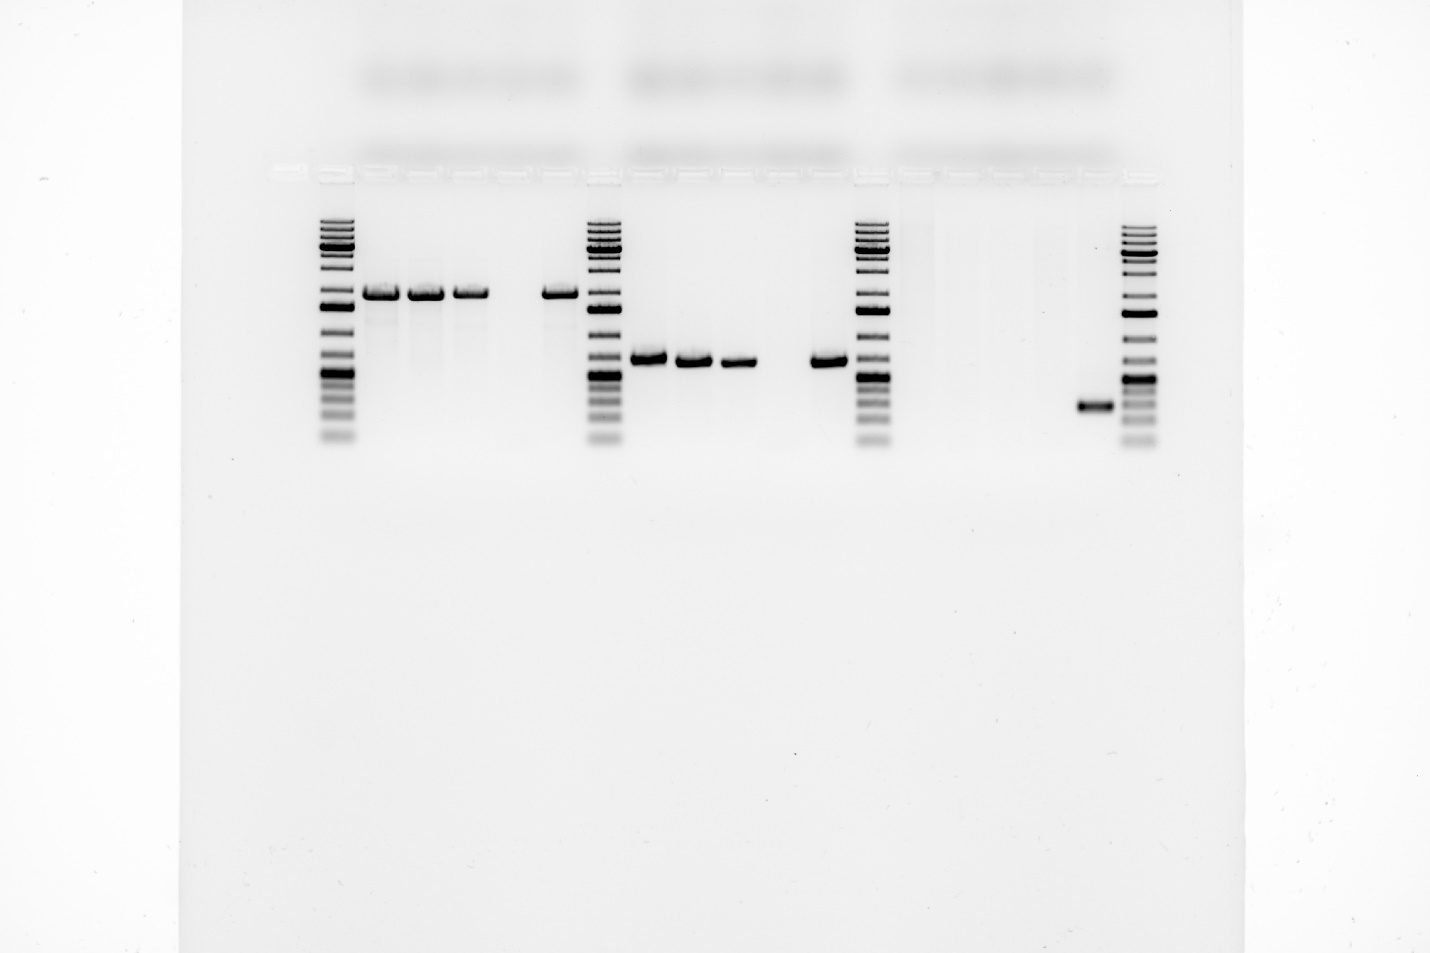

Supplement: Supplementary file 2 [file 46ca5ac1c5303987f2cbfe2f.docx]
